# Supplementary figures and images for: Identification of the Transcription Factor ATF3 as a Direct and Indirect Regulator of the LDLR
Source: MDPI journal article supplement (doi:10.3390/metabo12090840), 2022-09-06

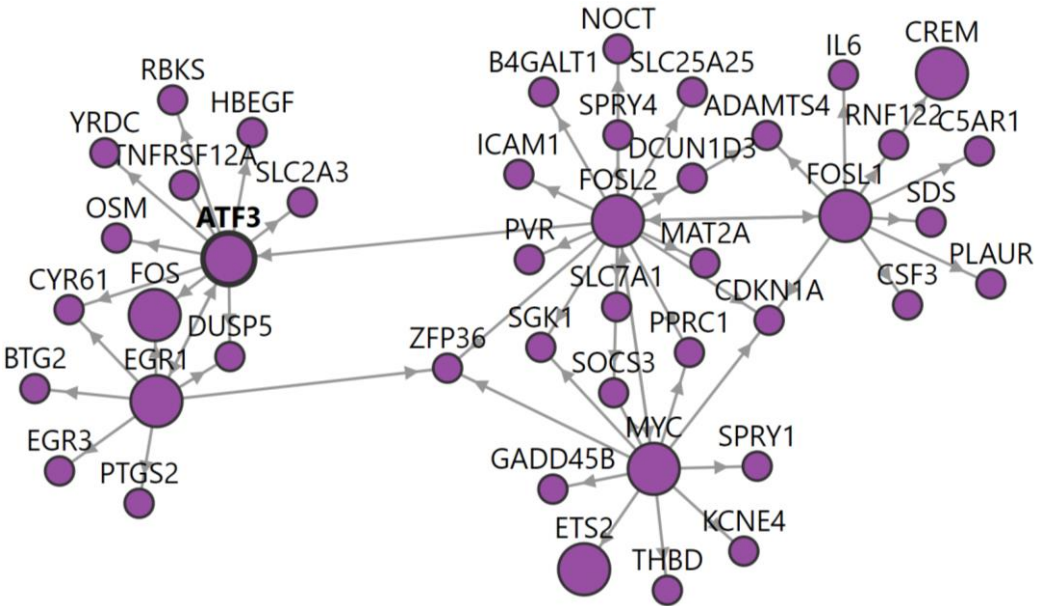

Supplement: s1 [file s1]
